# Supplementary material for: Advantages of a second ventilation circuit when using a double-lumen endotracheal tube
Source: Springer Nature journal article supplement (doi:10.1007/s12630-019-01553-y), 2019-12-17
Supplement: MOESM2 [file 17971174]

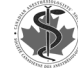

### eVideo legend

Video demonstrates the use of a second ventilating circuit attached to the operative lumen of a double-lumen endotracheal tube during one-lung ventilation for thoracic surgery in order to help detect leaks and endotracheal tube malposition. The video can be seen at

<https://vimeo.com/370217402>

| Time location | Topic                                                                                                                                                                              |
|---------------|------------------------------------------------------------------------------------------------------------------------------------------------------------------------------------|
| 1 min 17 sec  | The components of the circuit that are assembled from CPAP circuit parts.                                                                                                          |
| 3 min 7 sec   | The DLT will move outward after correct placement.                                                                                                                                 |
| 5 min 26 sec  | The correct amount of air in the endobronchial cuff is just enough to stop the leak.                                                                                               |
| 5 min 51 sec  | The second circuit bag when the DLT is moved outward and the endobronchial cuff begins to move into the carina.                                                                    |
| 6 min 15 sec  | Using the circuit to monitor the DLT position during transitioning to lateral decubitus.                                                                                           |
| 9 min 36 sec  | The bag movement prior to chest opening where indirect ventilation with 100% oxygen of the operative lung can be seen.                                                             |
| 10 min 10 sec | The difference in how we use the circuit when we use it for monitoring and when it is used for ventilating.                                                                        |
| 10 min 51 sec | Monitoring the pressure in the circuit and how we ventilate and inflate the lung for testing against leaks along the staple line and recruit atelectatic lung during re-expansion. |

CPAP = continuous positive airway pressure; DLT = double-lumen endotracheal tube.
